# Supplementary material for: Aspirin reduces the risk of death in patients with cirrhosis: a propensity-matched retrospective analysis of the MIMIC-IV database
Source: Research Square preprint supplement (doi:10.21203/rs.3.rs-7556874/v1), 2025-10-21
Supplement: Supplementary file 1 [file 22b27372ed454ad6d57ec2fe.docx]

| **S1 Table.** Variance inflation factors (VIF) for all covariates in the model. | | | |
| --- | --- | --- | --- |
| VariableName | GVIF | Df | GVIF^(1/(2*Df)) |
| Age | 2.0122919121512 | 1 | 1.41855275268535 |
| Gender | 1.10587214434743 | 1 | 1.05160455702105 |
| Ethnicity | 1.15491090077889 | 2 | 1.03666185880525 |
| Heart rate | 1.32920238373654 | 1 | 1.15291039709794 |
| Respiratory rate | 1.17749344332482 | 1 | 1.08512369954988 |
| SpO2 | 1.07131279490693 | 1 | 1.03504241212954 |
| MELD score | 14.5103934264394 | 1 | 3.80925103221609 |
| SOFA score | 2.00294127211703 | 1 | 1.4152530770562 |
| Charlson score | 2.06697057605988 | 1 | 1.43769627392571 |
| WBC | 1.3349399664893 | 1 | 1.15539602149622 |
| Hemoglobin | 1.20536856304269 | 1 | 1.09789278303607 |
| Platelet | 1.38281820781334 | 1 | 1.17593290957152 |
| ALT | 3.40735361127659 | 1 | 1.8459018422648 |
| AST | 3.32640876402279 | 1 | 1.82384450105342 |
| Total bilirubin | 3.49707878447082 | 1 | 1.87004780272345 |
| ALB | 1.2055091214563 | 1 | 1.09795679398431 |
| Creatinine | 4.50792398101264 | 1 | 2.12318722231758 |
| Lactate | 1.33420434704133 | 1 | 1.15507763680254 |
| INR | 8.23781447442763 | 1 | 2.87015931168074 |
| PT | 5.70204885595013 | 1 | 2.38789632437217 |
| PPT | 1.36122881513542 | 1 | 1.16671711015799 |
| Ascites | 1.22664743221793 | 1 | 1.10754116502184 |
| Hepatic encephalopathy | 1.08784847268464 | 1 | 1.04299974721216 |
| Gastrointestinal hemorrhage | 1.08751136175992 | 1 | 1.0428381282634 |
| Hepatorenal syndrome | 1.35013962357723 | 1 | 1.16195508672979 |
| Liver transplantation | 1.00987288067857 | 1 | 1.00492431589576 |
| Hypertension | 1.1113549555671 | 1 | 1.05420821262552 |
| T2DM | 1.27131485491308 | 1 | 1.12752598857546 |
| Cerebral infarction | 1.0490748999071 | 1 | 1.02424357450125 |
| Myocardial infarction | 1.10089443418071 | 1 | 1.04923516629052 |
| COPD | 1.0964908275026 | 1 | 1.04713457946083 |
| Sepsis | 1.14134614513114 | 1 | 1.06833802943223 |
| CRRT | 1.50330831013109 | 1 | 1.22609473945984 |
| Mechanical ventilation | 1.1272476571011 | 1 | 1.06171919880028 |
| Aspirin | 1.12453236285502 | 1 | 1.06043970260219 |
| Abbreviations: SpO2, blood oxygen saturation; MELD, model for end-stage liver disease; SOFA, Sequential Organ Failure Assessment; WBC, white blood cell count; ALT, alanine aminotransferase; AST, aspartate aminotransferase; ALB, serum albumin; INR, international normalized ratio; PT, prothrombin time; PTT, partial thromboplastin time; T2DM, type 2 diabetes mellitus; COPD, chronic obstructive pulmonary disease; CRRT, continuous renal replacement therapy. | | | |
